# Supplementary material for: A defect-rich ultrathin MoS2/rGO nanosheet electrocatalyst for the oxygen reduction reaction
Source: Royal Society of Chemistry journal article supplement (doi:10.1039/d1ra03552e), 2021-01-01
Supplement: d1ra03552e1.pdf [file d1ra03552e1.pdf]

## Defect-rich ultrathin MoS<sub>2</sub>/rGO nanosheets electrocatalyst for oxygen reduction reaction

Songlin Zhang, Yujiao Xie, Mengna Yang, Zhongying Li, Lulu Zhang, Jiahao Guo,\*

Jing Tang, \* Junming Chen, Xuchun Wang

College of Chemistry and Materials Engineering, Anhui Science and Technology University,  
Bengbu, Anhui, 233030, P. R. China.

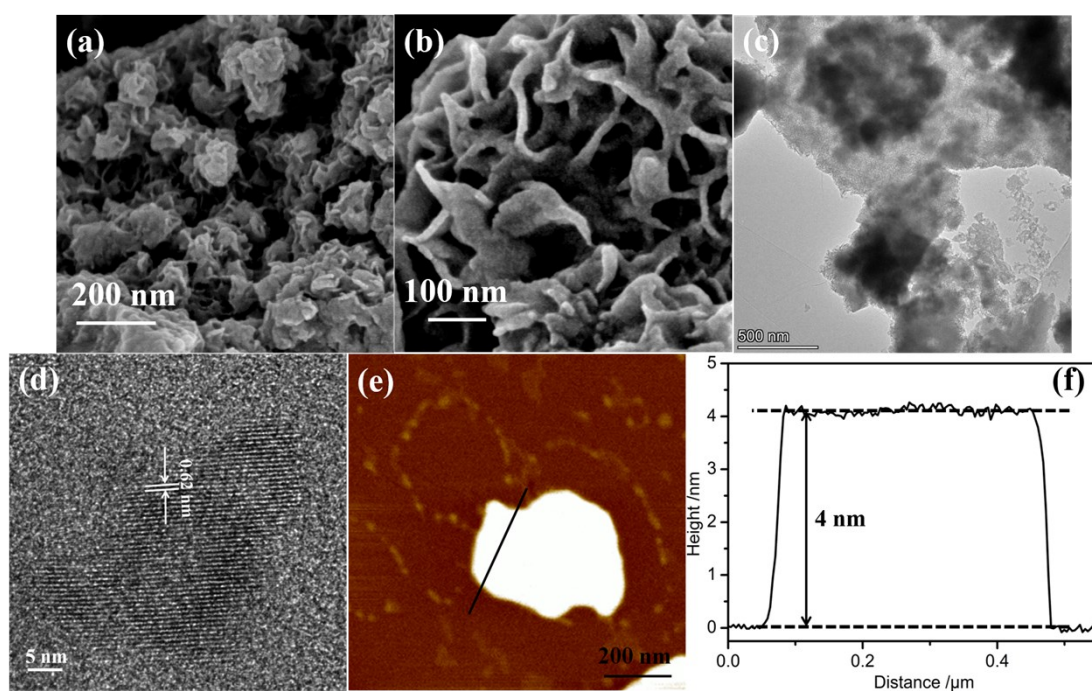

**Figure S1** (a) Low-magnification SEM image, (b) High-magnification SEM image, (c) TEM image, (d) HRTEM image, (e) AFM image and (f) height profiles from sections as indicated by the black line of MoS<sub>2</sub>.

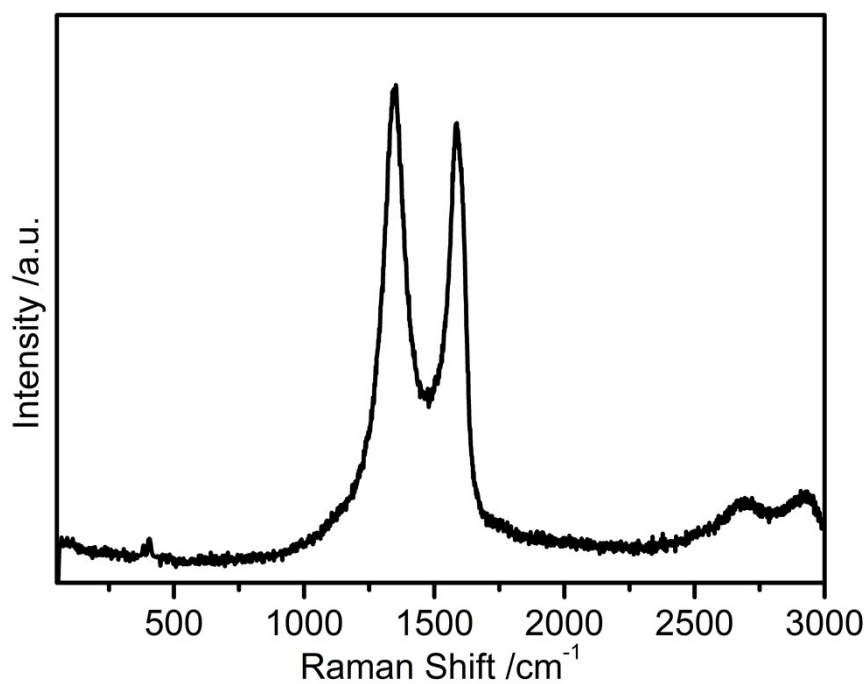

Figure S2 Raman spectrum of MoS<sub>2</sub>/rGO

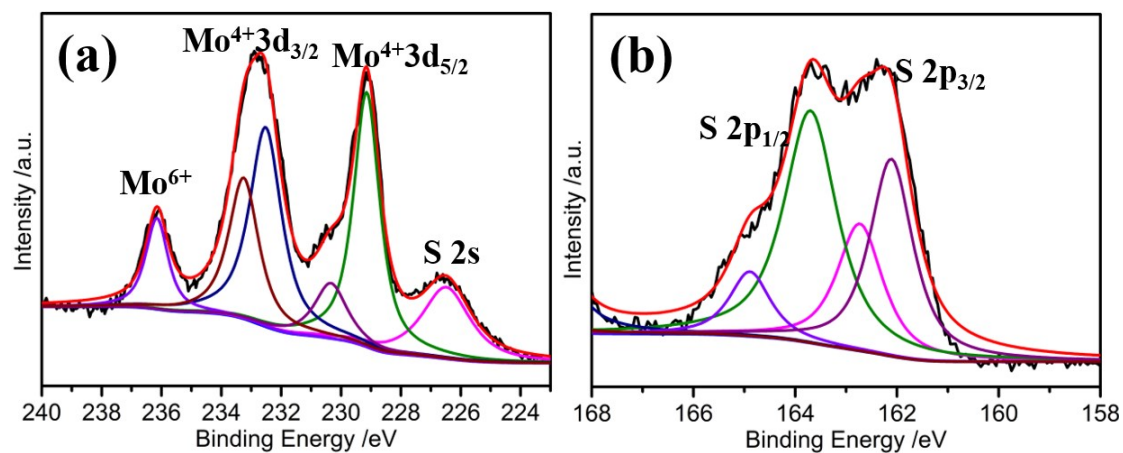

Figure S3 High-resolution XPS profiles of (a) Mo3d and (b) S2p of MoS<sub>2</sub>.

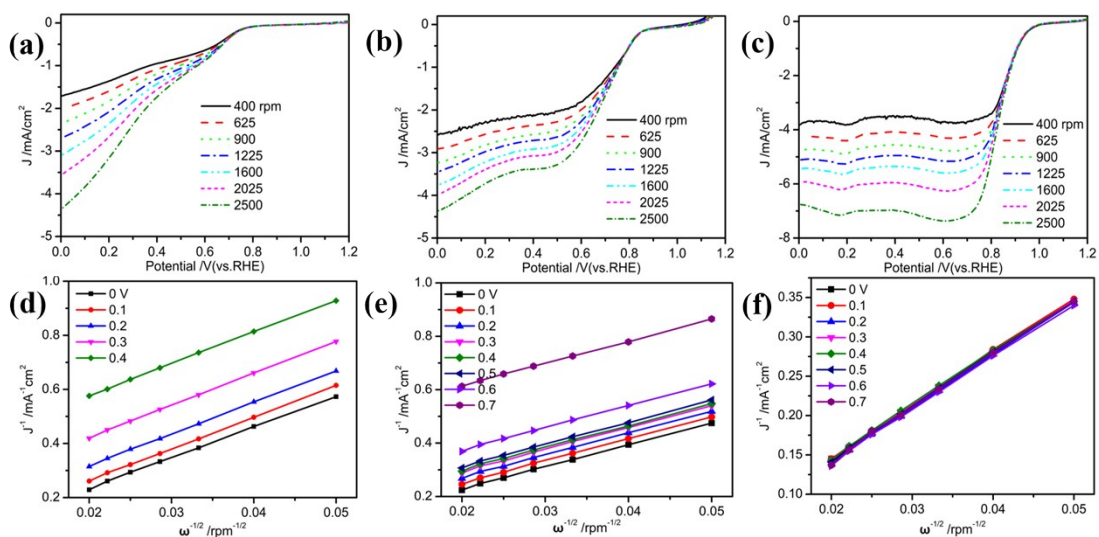

**Figure S4** (a,d) LSV and calculated K-L plots of MoS<sub>2</sub>, (b,e) LSV and calculated K-L plots of rGO, (c,f) LSV and calculated K-L plots of Pt/C.

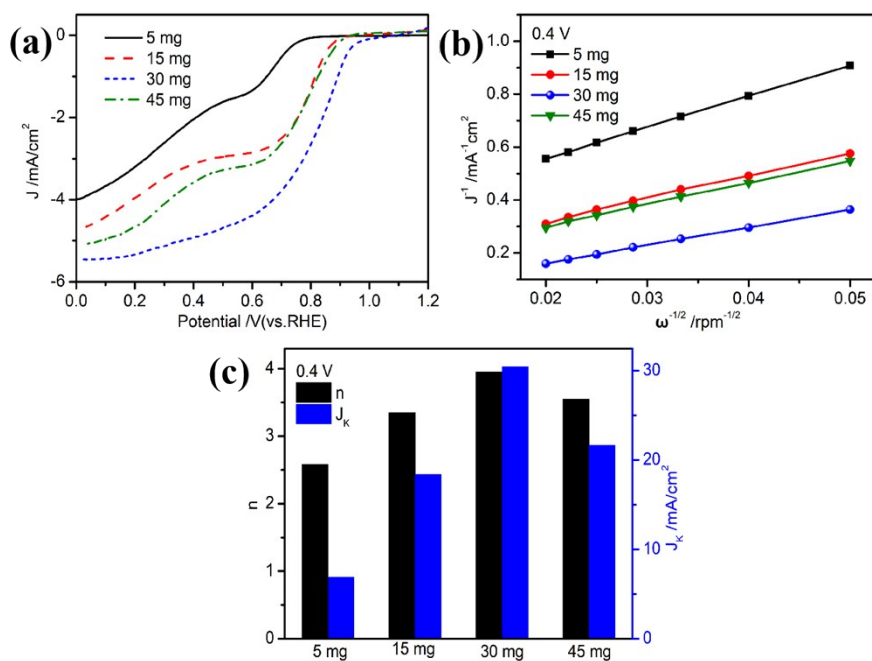

**Figure S5** (a) Linear sweep voltammetry (LSV) of MoS<sub>2</sub>/rGO samples with different graphene content in O<sub>2</sub>-saturated 0.1 M KOH at a scan rate of 10 mV·s<sup>-1</sup> with an RDE rotation rate of 1600 rpm. (b) K-L plots at 0.4 V of MoS<sub>2</sub>/rGO samples with different graphene content. (c) transferred electron number  $n$  and  $J_k$  of the ORR for MoS<sub>2</sub>/rGO samples with different graphene content.

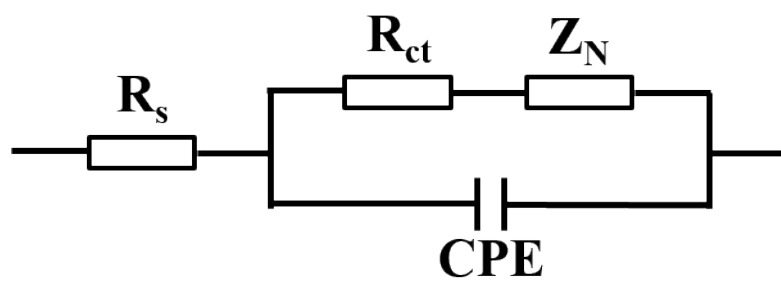

**Figure S6** The equivalent circuit model of EIS.
